# Supplementary material for: A FRET-based assay for characterization of alternative splicing events using peptide nucleic acid fluorescence in situ hybridization
Source: PubMed Central journal article supplement — Nucleic Acids Res. 2009 Jun 26;37(17):e116. doi: 10.1093/nar/gkp551 (PMC2761257; doi:10.1093/nar/gkp551), 2009-06-26
Supplement: gkp551_1.pdf [file gkp551_1.pdf]

## Supplementary Information

### **A FRET-based assay for characterization of alternative splicing events using peptide nucleic acid fluorescence *in situ* hybridization.**

Ana M. Blanco<sup>1</sup>, Laura Rausell<sup>1</sup>, Begoña Aguado<sup>2</sup>, Manuel Perez-Alonso<sup>1</sup>§, Rubén Artero<sup>3</sup>\*

<sup>1</sup> Sistemas Genómicos S.L., Parque Tecnológico de Valencia, Ronda G. Marconi 6, E-46980 Paterna, Spain, <sup>2</sup> Centro de Biología Molecular Severo Ochoa (CBMSO- CSIC UAM), Cantoblanco 28049 Madrid, Spain, <sup>3</sup> Department of Genetics, University of Valencia, Dr. Moliner, 50, E-46100 Burjassot, Spain.

\* To whom correspondence should be addressed. Tel +34 96 3543005 Fax +34 96 3543029 E-mail ruben.artero@uv.es

§ Present address: Department of Genetics, University of Valencia, Dr. Moliner, 50, E-46100 Burjassot, Spain.

| <b>A</b> | <b>ROI</b>     | <b>ROI 1</b> | <b>ROI 2</b> | <b>ROI 3</b> | <b>ROI 4</b> | <b>ROI 5</b> | <b>ROI 6</b> | <b>ROI 7</b> | <b>ROI 8</b> | <b>ROI 9</b> | <b>ROI 10</b> |
|----------|----------------|--------------|--------------|--------------|--------------|--------------|--------------|--------------|--------------|--------------|---------------|
|          | <b>FRET</b>    | 108.99       | 132.97       | 152.51       | 93.66        | 122.97       | 157.98       | 79.98        | 104.76       | 81.81        | 0.00          |
|          | <b>FRETeff</b> | <b>0.37</b>  | <b>0.38</b>  | <b>0.50</b>  | <b>0.35</b>  | <b>0.43</b>  | <b>0.59</b>  | <b>0.52</b>  | <b>0.49</b>  | <b>0.53</b>  | <b>0.00</b>   |
|          | <b>A (ch1)</b> | 1395.09      | 1736.34      | 1815.65      | 1330.34      | 1486.02      | 1821.07      | 759.41       | 896.07       | 772.48       | 0.00          |
|          | <b>B (ch2)</b> | 584.64       | 707.44       | 711.71       | 534.06       | 608.13       | 686.60       | 331.96       | 429.43       | 337.88       | 1.17          |
|          | <b>C (ch3)</b> | 296.65       | 346.26       | 307.70       | 265.62       | 287.83       | 266.38       | 152.39       | 215.63       | 154.70       | 6.16          |
| <b>B</b> | <b>ROI</b>     | <b>ROI 1</b> | <b>ROI 2</b> | <b>ROI 3</b> | <b>ROI 4</b> | <b>ROI 5</b> | <b>ROI 6</b> | <b>ROI 7</b> | <b>ROI 8</b> |              |               |
|          | <b>FRET</b>    | 87.75        | 82.35        | 57.97        | 72.95        | 72.29        | 72.94        | 73.27        | 88.65        |              |               |
|          | <b>FRETeff</b> | <b>0.07</b>  | <b>0.07</b>  | <b>0.05</b>  | <b>0.05</b>  | <b>0.05</b>  | <b>0.05</b>  | <b>0.05</b>  | <b>0.07</b>  |              |               |
|          | <b>A (ch1)</b> | 1679.70      | 1470.21      | 1571.84      | 1795.93      | 2030.80      | 2048.29      | 1989.47      | 1681.55      |              |               |
|          | <b>B (ch2)</b> | 1378.88      | 1213.82      | 1268.97      | 1414.40      | 1533.58      | 1550.17      | 1561.17      | 1303.71      |              |               |
|          | <b>C (ch3)</b> | 1318.40      | 1155.83      | 1237.51      | 1356.61      | 1458.49      | 1475.61      | 1505.38      | 1214.57      |              |               |
| <b>C</b> | <b>ROI</b>     | <b>ROI 1</b> | <b>ROI 2</b> | <b>ROI 3</b> | <b>ROI 4</b> | <b>ROI 5</b> | <b>ROI 6</b> | <b>ROI 7</b> | <b>ROI 8</b> |              |               |
|          | <b>FRET</b>    | 167.95       | 131.95       | 175.88       | 234.93       | 140.00       | 158.50       | 151.74       | 212.55       |              |               |
|          | <b>FRETeff</b> | <b>0.74</b>  | <b>0.52</b>  | <b>0.80</b>  | <b>0.73</b>  | <b>0.75</b>  | <b>0.99</b>  | <b>0.85</b>  | <b>0.93</b>  |              |               |
|          | <b>A (ch1)</b> | 2337.68      | 2006.16      | 2618.89      | 2686.84      | 1926.50      | 2050.87      | 1910.66      | 2114.46      |              |               |
|          | <b>B (ch2)</b> | 757.80       | 683.89       | 811.35       | 887.16       | 627.13       | 646.73       | 628.51       | 764.67       |              |               |
|          | <b>C (ch3)</b> | 225.72       | 253.61       | 219.69       | 225.76       | 187.37       | 159.71       | 177.51       | 228.53       |              |               |
| <b>D</b> | <b>ROI</b>     | <b>ROI 1</b> | <b>ROI 2</b> | <b>ROI 3</b> | <b>ROI 4</b> | <b>ROI 5</b> | <b>ROI 6</b> | <b>ROI 7</b> |              |              |               |
|          | <b>FRET</b>    | 0.00         | 0.00         | 0.00         | 0.00         | 64.51        | 0.00         | 0.00         |              |              |               |
|          | <b>FRETeff</b> | <b>0.00</b>  | <b>0.00</b>  | <b>0.00</b>  | <b>0.00</b>  | <b>0.06</b>  | <b>0.00</b>  | <b>0.00</b>  |              |              |               |
|          | <b>A (ch1)</b> | 2466.05      | 2082.23      | 1886.69      | 1411.73      | 1719.72      | 1768.88      | 1423.56      |              |              |               |
|          | <b>B (ch2)</b> | 2058.19      | 1504.80      | 1402.78      | 1265.97      | 1452.93      | 1101.37      | 1298.98      |              |              |               |
|          | <b>C (ch3)</b> | 1923.55      | 1212.02      | 1276.53      | 1227.11      | 1161.87      | 1123.41      | 1215.56      |              |              |               |

**Figure S.1.-** Values of FRET, FRET efficiency and excitation channels of the representative laser scanning microscope FRET reports derived from e1A/e2D PNA probes detecting FSI isoform of *LY6G5B* gene. After manual ROIs selection, the software generated a report with FRET values information, and FRET efficiency in percent of each ROI selected, correcting the optical crosstalk and the background effect as reference with Channel A (A,ch1) that is the excitation with excitation wavelength of donor and detection with parameter settings of donor (donor channel), with Channel B (B, ch2) that is the excitation with excitation wavelength of donor and detection with parameter settings of acceptor (FRET channel) and Channel C (C, ch3) is the excitation with excitation wavelength of acceptor and detection with parameter settings of acceptor (acceptor channel). (A) Values of the different cytoplasmic ROIs selected in the e1A-Cy5/e2D-Cy3 FRET report shown in Figure 4.A; (B) Values derived from the cytoplasmic negative e1A-Cy5/e2Dsense-Cy3 FRET report shown in Figure 4.B; (C) Values of the different nucleolar ROIs selected in the e1A-Cy5/e2D-Cy3 FRET report shown in Figure 5.A; and (D) Values derived from the nucleolar negative e1A-Cy5/e2Dsense-Cy3 FRET report shown in Figure 5.B.

|          |                |               |               |               |               |               |              |              |              |              |
|----------|----------------|---------------|---------------|---------------|---------------|---------------|--------------|--------------|--------------|--------------|
| <b>A</b> | <b>ROI</b>     | <b>ROI 1</b>  | <b>ROI 2</b>  | <b>ROI 3</b>  | <b>ROI 4</b>  | <b>ROI 5</b>  | <b>ROI 6</b> | <b>ROI 7</b> | <b>ROI 8</b> | <b>ROI 9</b> |
|          | <b>FRET</b>    | 799.30        | 653.35        | 765.46        | 418.41        | 339.84        | 548.05       | 834.61       | 664.56       | 0.00         |
|          | <b>FRETEff</b> | <b>0.30</b>   | <b>0.28</b>   | <b>0.30</b>   | <b>0.38</b>   | <b>0.32</b>   | <b>0.35</b>  | <b>0.31</b>  | <b>0.29</b>  | <b>0.00</b>  |
|          | <b>A (ch1)</b> | 2906.08       | 2563.27       | 2766.04       | 1373.07       | 1210.19       | 1671.33      | 2932.55      | 2553.01      | 0.00         |
|          | <b>B (ch2)</b> | 2972.96       | 2530.79       | 2816.38       | 1332.70       | 1199.01       | 1803.25      | 3041.88      | 2516.12      | 0.00         |
|          | <b>C (ch3)</b> | 2686.08       | 2313.52       | 2531.46       | 1111.39       | 1054.19       | 1551.94      | 2729.86      | 2278.56      | 0.46         |
|          |                |               |               |               |               |               |              |              |              |              |
| <b>B</b> | <b>ROI</b>     | <b>ROI 1</b>  | <b>ROI 2</b>  | <b>ROI 3</b>  | <b>ROI 4</b>  | <b>ROI 5</b>  | <b>ROI 6</b> | <b>ROI 7</b> | <b>ROI 8</b> |              |
|          | <b>FRET</b>    | 0.00          | 0.00          | 0.00          | 0.00          | 0.00          | 0.00         | 0.00         | 0.00         |              |
|          | <b>FRETEff</b> | <b>0.00</b>   | <b>0.00</b>   | <b>0.00</b>   | <b>0.00</b>   | <b>0.02</b>   | <b>0.00</b>  | <b>0.00</b>  | <b>0.00</b>  |              |
|          | <b>A (ch1)</b> | 2043.20       | 2311.34       | 2213.07       | 2380.95       | 1754.1        | 1953.39      | 2256.88      | 0.00         |              |
|          | <b>B (ch2)</b> | 1081.75       | 1166.72       | 1121.36       | 1194.30       | 942.40        | 1026.81      | 1117.60      | 0.00         |              |
|          | <b>C (ch3)</b> | 1271.69       | 1326.78       | 1315.47       | 1424.57       | 1075.7        | 1200.26      | 1271.95      | 0.00         |              |
|          |                |               |               |               |               |               |              |              |              |              |
| <b>C</b> | <b>ROI</b>     | <b>ROI 1</b>  | <b>ROI 2</b>  | <b>ROI 3</b>  | <b>ROI 4</b>  | <b>ROI 5</b>  | <b>ROI 6</b> |              |              |              |
|          | <b>FRET</b>    | 183.96        | 174.47        | 282.05        | 222.41        | 167.18        | 217.41       |              |              |              |
|          | <b>FRETEff</b> | <b>0.15</b>   | <b>0.14</b>   | <b>0.22</b>   | <b>0.17</b>   | <b>0.14</b>   | <b>0.22</b>  |              |              |              |
|          | <b>A (ch1)</b> | 2062.36       | 2236.55       | 2425.31       | 2395.52       | 1873.54       | 1549.20      |              |              |              |
|          | <b>B (ch2)</b> | 1784.24       | 1857.25       | 2088.16       | 2032.66       | 1663.91       | 1464.65      |              |              |              |
|          | <b>C (ch3)</b> | 1213.86       | 1213.33       | 1279.17       | 1314.95       | 1186.78       | 1000.13      |              |              |              |
|          |                |               |               |               |               |               |              |              |              |              |
| <b>D</b> | <b>ROI</b>     | <b>ROI 1</b>  | <b>ROI 2</b>  | <b>ROI 3</b>  | <b>ROI 4</b>  | <b>ROI 5</b>  | <b>ROI 6</b> | <b>ROI 7</b> | <b>ROI 8</b> | <b>ROI 9</b> |
|          | <b>FRET</b>    | 0.00          | 0.00          | 0.00          | 0.00          | 0.00          | 0.00         | 0.00         | 0.00         | 0.00         |
|          | <b>FRETEff</b> | <b>0.00</b>   | <b>0.01</b>   | <b>0.00</b>   | <b>0.00</b>   | <b>0.00</b>   | <b>0.00</b>  | <b>0.03</b>  | <b>0.00</b>  | <b>0.00</b>  |
|          | <b>A (ch1)</b> | 3678.12       | 3046.66       | 2820.83       | 3125.01       | 2934.49       | 3178.58      | 3389.92      | 3634.56      | 3385.23      |
|          | <b>B (ch2)</b> | 1436.73       | 1201.29       | 984.94        | 1191.34       | 1065.86       | 1164.26      | 1265.81      | 1448.63      | 1279.39      |
|          | <b>C (ch3)</b> | 910.13        | 838.23        | 769.45        | 742.74        | 717.16        | 662.46       | 709.04       | 829.07       | 870.86       |
|          |                | <b>ROI 10</b> | <b>ROI 11</b> | <b>ROI 12</b> | <b>ROI 13</b> | <b>ROI 14</b> |              |              |              |              |
|          |                | 0.00          | 0.00          | 0.00          | 0.00          | 0.00          |              |              |              |              |
|          |                | <b>0.00</b>   | <b>0.00</b>   | <b>0.00</b>   | <b>0.00</b>   | <b>0.00</b>   |              |              |              |              |
|          |                | 3430.84       | 3283.72       | 3058.75       | 3101.22       | 3566.87       |              |              |              |              |
|          |                | 1254.73       | 1192.23       | 1158.65       | 1160.54       | 1351.50       |              |              |              |              |
|          |                | 719.17        | 671.89        | 819.28        | 857.35        | 915.53        |              |              |              |              |
|          |                |               |               |               |               |               |              |              |              |              |
|          |                |               |               |               |               |               |              |              |              |              |

**Figure S.2.-** Values of FRET, FRET efficiency and excitation channels of the representative laser scanning microscope FRET reports derived from e1A/i1D PNA probes detecting IRI isoform of *LY6G5B* gene. After manual ROIs selection, the software generated a report with FRET values information, and FRET efficiency in percent of each ROI selected, correcting the optical crosstalk and the background effect as reference with Channel A (A,ch1), Channel B (B, ch2) and Channel C (C, ch3). (A) Values of the different cytoplasmic ROIs selected in the e1A-Cy5/i1D-Cy3 FRET report shown in Figure 6.A; (B) Values derived from the cytoplasmic negative e1A-Cy5/i1Dsense-Cy3 FRET report shown in Figure 6.B; (C) Values of the different nucleolar ROIs selected in the e1A-Cy5/i1D-Cy3 FRET report shown in Figure 7.A; and (D) Values derived from the nucleolar negative e1A-Cy5/i1Dsense-Cy3 FRET report shown in Figure 7.B.
